# Supplementary material
Source: publisher site journal article supplement (https://www.dovepress.com/article/533799)
Supplement: Supplementary file 1 [file 533799_Supplements_2.pdf]

## Supplementary S1. Differential expression of iCD8+TILs

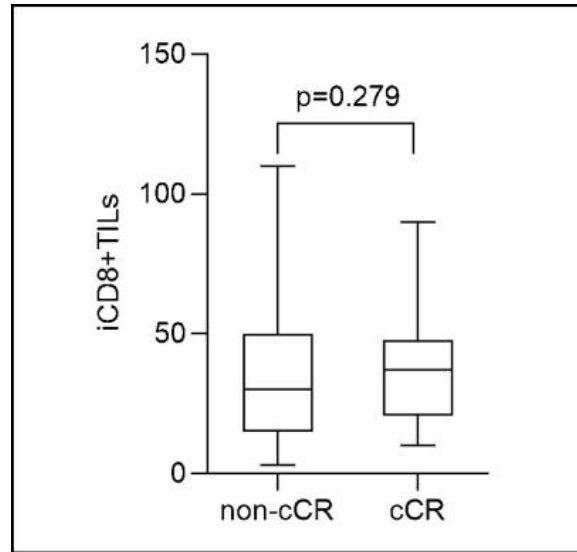

iCD8+TILs differed between non-cCR and cCR.

iCD8+TILs: intratumoral CD8+ tumor infiltrating lymphocytes; non- cCR: non- complete clinical response; cCR: complete clinical response;  $p=0.279$ ,

indicating no statistically significant difference between the two groups.

## Supplementary S2. Differential expression of sCD8+TILs

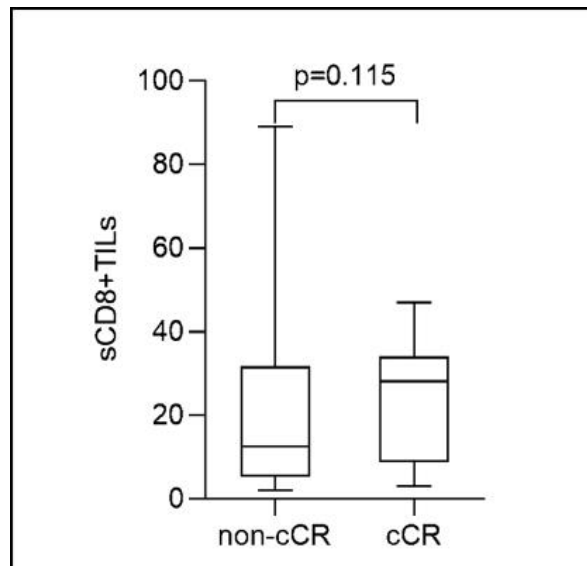

sCD8+TILs differed between non-cCR and cCR.

sCD8+TILs: stromal CD8+ tumor infiltrating lymphocytes; non- cCR: non- complete clinical response; cCR: complete clinical response;  $p=0.115$ , indicating no

statistically significant difference between the two groups.

### Supplementary 3. Raw Data of Analysis

| ID | age | menopausal | T     | lymph  | nodes |    |      |       |          | clinical | intratumoral |          | stromal |
|----|-----|------------|-------|--------|-------|----|------|-------|----------|----------|--------------|----------|---------|
|    |     | status     | stage | status | ER    | PR | HER2 | KI671 | response | pCR      | CD8+TILs     | CD8+TILs |         |
| 1  | 50  | 1          | 0     | 0      |       | 1  | 1    | 1     | 0        | 0        | 0            | 12       | 25      |
| 4  | 39  | 0          | 0     | 1      |       | 1  | 1    | 0     | 0        | 0        | 0            | 85       | 2       |
| 5  | 50  | 1          | 0     | 1      |       | 1  | 1    | 0     | 1        | 0        | 0            | 75       | 10      |
| 6  | 54  | 1          | 1     | 0      |       | 1  | 1    | 1     | 1        | 0        | 0            | 8        | 9       |
| 9  | 43  | 0          | 0     | 1      |       | 0  | 0    | 1     | 1        | 0        | 0            | 16       | 7       |
| 11 | 51  | 1          | 0     | 1      |       | 1  | 1    | 0     | 0        | 0        | 0            | 46       | 2       |
| 12 | 52  | 1          | 0     | 0      |       | 1  | 1    | 0     | 1        | 0        | 0            | 15       | 45      |
| 14 | 43  | 0          | 0     | 1      |       | 1  | 1    | 0     | 0        | 0        | 0            | 15       | 45      |
| 16 | 35  | 0          | 1     | 1      |       | 1  | 1    | 0     | 1        | 0        | 0            | 18       | 11      |
| 17 | 56  | 1          | 0     | 0      |       | 0  | 0    | 0     | 1        | 0        | 0            | 47       | 40      |
| 18 | 68  | 1          | 0     | 1      |       | 0  | 0    | 1     | 1        | 0        | 0            | 46       | 4       |
| 19 | 63  | 1          | 1     | 1      |       | 0  | 0    | 1     | 1        | 0        | 0            | 25       | 12      |
| 20 | 66  | 1          | 0     | 1      |       | 1  | 1    | 0     | 0        | 0        | 0            | 67       | 4       |
| 23 | 47  | 1          | 0     | 1      |       | 0  | 0    | 0     | 1        | 0        | 1            | 80       | 28      |
| 24 | 43  | 0          | 0     | 1      |       | 1  | 0    | 0     | 1        | 0        | 0            | 40       | 8       |
| 26 | 53  | 1          | 0     | 1      |       | 0  | 0    | 1     | 1        | 0        | 0            | 43       | 18      |
| 29 | 65  | 1          | 0     | 1      |       | 1  | 1    | 0     | 0        | 0        | 0            | 40       | 3       |
| 30 | 49  | 1          | 0     | 1      |       | 1  | 1    | 0     | 0        | 0        | 0            | 48       | 10      |
| 31 | 36  | 0          | 1     | 1      |       | 1  | 1    | 1     | 1        | 0        | 0            | 93       | 4       |
| 33 | 62  | 1          | 0     | 1      |       | 1  | 1    | 0     | 1        | 0        | 0            | 30       | 34      |
| 34 | 37  | 0          | 0     | 1      |       | 1  | 1    | 0     | 1        | 0        | 0            | 14       | 10      |

---

|    |    |   |   |   |   |   |   |   |   |   |     |    |
|----|----|---|---|---|---|---|---|---|---|---|-----|----|
| 35 | 59 | 1 | 0 | 1 | 0 | 0 | 1 | 1 | 0 | 1 | 18  | 25 |
| 36 | 47 | 0 | 0 | 0 | 0 | 0 | 1 | 1 | 0 | 0 | 18  | 9  |
| 37 | 56 | 1 | 1 | 1 | 1 | 0 | 0 | 1 | 0 | 0 | 10  | 35 |
| 39 | 36 | 0 | 0 | 1 | 0 | 0 | 0 | 1 | 0 | 0 | 30  | 32 |
| 40 | 38 | 0 | 0 | 1 | 0 | 0 | 1 | 1 | 0 | 0 | 110 | 15 |
| 41 | 42 | 0 | 0 | 0 | 1 | 1 | 0 | 1 | 0 | 0 | 14  | 3  |
| 42 | 41 | 0 | 1 | 1 | 0 | 0 | 1 | 1 | 0 | 0 | 18  | 78 |
| 43 | 53 | 1 | 1 | 1 | 0 | 0 | 1 | 1 | 0 | 0 | 32  | 56 |
| 44 | 60 | 1 | 1 | 1 | 1 | 1 | 1 | 0 | 0 | 0 | 12  | 20 |
| 47 | 47 | 0 | 0 | 0 | 1 | 1 | 0 | 1 | 0 | 0 | 80  | 4  |
| 48 | 48 | 1 | 0 | 0 | 1 | 1 | 1 | 0 | 0 | 0 | 35  | 25 |
| 49 | 42 | 0 | 0 | 0 | 1 | 1 | 0 | 0 | 0 | 0 | 20  | 5  |
| 51 | 39 | 0 | 0 | 1 | 1 | 1 | 0 | 0 | 0 | 0 | 3   | 2  |
| 52 | 50 | 1 | 0 | 1 | 1 | 1 | 0 | 1 | 0 | 0 | 15  | 16 |
| 53 | 54 | 1 | 1 | 0 | 1 | 1 | 1 | 1 | 0 | 0 | 18  | 7  |
| 56 | 43 | 0 | 0 | 1 | 0 | 0 | 1 | 1 | 0 | 0 | 34  | 18 |
| 57 | 52 | 1 | 1 | 0 | 0 | 0 | 1 | 1 | 0 | 0 | 6   | 13 |
| 58 | 51 | 1 | 0 | 1 | 1 | 1 | 0 | 0 | 0 | 0 | 20  | 2  |
| 59 | 52 | 1 | 0 | 0 | 1 | 1 | 0 | 1 | 0 | 0 | 40  | 38 |
| 61 | 43 | 0 | 0 | 1 | 1 | 1 | 0 | 0 | 0 | 0 | 50  | 50 |
| 63 | 35 | 0 | 1 | 1 | 1 | 1 | 0 | 1 | 0 | 0 | 98  | 11 |
| 64 | 56 | 1 | 0 | 0 | 0 | 0 | 0 | 1 | 0 | 0 | 20  | 40 |
| 65 | 68 | 1 | 0 | 1 | 0 | 0 | 1 | 1 | 0 | 0 | 56  | 5  |
| 66 | 63 | 1 | 1 | 1 | 0 | 0 | 1 | 1 | 0 | 0 | 15  | 12 |

---

---

|    |    |   |   |   |   |   |   |   |   |   |    |    |
|----|----|---|---|---|---|---|---|---|---|---|----|----|
| 67 | 66 | 1 | 0 | 1 | 1 | 1 | 0 | 1 | 0 | 0 | 12 | 49 |
| 69 | 45 | 0 | 1 | 1 | 1 | 1 | 0 | 1 | 0 | 0 | 25 | 9  |
| 70 | 47 | 0 | 0 | 1 | 0 | 0 | 0 | 1 | 0 | 1 | 76 | 52 |
| 71 | 43 | 0 | 0 | 1 | 1 | 0 | 0 | 1 | 0 | 0 | 78 | 4  |
| 73 | 53 | 1 | 0 | 1 | 0 | 0 | 1 | 1 | 0 | 0 | 26 | 18 |
| 75 | 32 | 0 | 1 | 0 | 0 | 0 | 1 | 1 | 0 | 1 | 30 | 32 |
| 76 | 65 | 1 | 0 | 1 | 1 | 1 | 0 | 0 | 0 | 0 | 40 | 3  |
| 77 | 50 | 1 | 0 | 1 | 1 | 1 | 0 | 0 | 0 | 0 | 15 | 10 |
| 79 | 56 | 1 | 0 | 1 | 0 | 0 | 0 | 1 | 0 | 0 | 43 | 30 |
| 80 | 62 | 1 | 0 | 1 | 1 | 1 | 0 | 1 | 0 | 0 | 5  | 31 |
| 81 | 37 | 0 | 0 | 1 | 1 | 1 | 0 | 1 | 0 | 0 | 59 | 10 |
| 83 | 47 | 0 | 0 | 0 | 0 | 0 | 1 | 1 | 0 | 0 | 46 | 18 |
| 86 | 36 | 0 | 0 | 1 | 0 | 0 | 0 | 1 | 0 | 0 | 16 | 30 |
| 87 | 38 | 0 | 0 | 1 | 0 | 0 | 1 | 1 | 0 | 0 | 50 | 6  |
| 88 | 42 | 0 | 0 | 0 | 1 | 1 | 0 | 1 | 0 | 0 | 5  | 3  |
| 89 | 41 | 0 | 1 | 1 | 0 | 0 | 1 | 1 | 0 | 0 | 9  | 89 |
| 90 | 53 | 1 | 1 | 1 | 0 | 0 | 1 | 1 | 0 | 0 | 56 | 35 |
| 93 | 41 | 0 | 0 | 0 | 0 | 0 | 0 | 1 | 0 | 0 | 51 | 29 |
| 94 | 47 | 0 | 0 | 0 | 1 | 1 | 0 | 1 | 0 | 0 | 57 | 4  |
| 2  | 42 | 0 | 0 | 0 | 1 | 1 | 0 | 0 | 1 | 1 | 35 | 5  |
| 3  | 35 | 0 | 0 | 1 | 1 | 1 | 0 | 1 | 1 | 1 | 36 | 8  |
| 7  | 59 | 1 | 0 | 1 | 0 | 0 | 1 | 1 | 1 | 1 | 40 | 47 |
| 8  | 62 | 1 | 1 | 0 | 0 | 0 | 1 | 0 | 1 | 1 | 37 | 30 |
| 10 | 50 | 1 | 1 | 0 | 0 | 0 | 1 | 1 | 1 | 0 | 26 | 34 |

---

---

|    |    |   |   |   |   |   |   |   |   |   |    |    |
|----|----|---|---|---|---|---|---|---|---|---|----|----|
| 13 | 39 | 0 | 1 | 0 | 0 | 0 | 1 | 0 | 1 | 1 | 51 | 45 |
| 15 | 56 | 1 | 0 | 0 | 0 | 0 | 1 | 1 | 1 | 1 | 35 | 46 |
| 21 | 55 | 1 | 0 | 1 | 1 | 1 | 0 | 1 | 1 | 0 | 45 | 37 |
| 22 | 45 | 0 | 1 | 1 | 1 | 1 | 0 | 1 | 1 | 0 | 18 | 5  |
| 25 | 51 | 1 | 1 | 0 | 1 | 1 | 0 | 1 | 1 | 1 | 90 | 3  |
| 27 | 55 | 1 | 0 | 1 | 1 | 0 | 1 | 1 | 1 | 1 | 47 | 21 |
| 28 | 32 | 0 | 1 | 0 | 0 | 0 | 1 | 1 | 1 | 1 | 52 | 30 |
| 32 | 56 | 1 | 0 | 1 | 0 | 0 | 0 | 1 | 1 | 0 | 50 | 28 |
| 38 | 40 | 0 | 0 | 0 | 1 | 1 | 0 | 0 | 1 | 0 | 15 | 14 |
| 45 | 40 | 0 | 0 | 1 | 1 | 1 | 0 | 1 | 1 | 0 | 21 | 43 |
| 46 | 41 | 0 | 0 | 0 | 0 | 0 | 0 | 1 | 1 | 0 | 45 | 26 |
| 50 | 35 | 0 | 1 | 1 | 1 | 1 | 0 | 1 | 1 | 1 | 56 | 8  |
| 54 | 59 | 1 | 0 | 1 | 0 | 0 | 0 | 1 | 1 | 1 | 46 | 26 |
| 55 | 62 | 1 | 1 | 0 | 0 | 0 | 0 | 0 | 1 | 1 | 50 | 29 |
| 60 | 39 | 0 | 1 | 0 | 0 | 0 | 1 | 0 | 1 | 1 | 18 | 34 |
| 62 | 56 | 1 | 0 | 0 | 0 | 0 | 1 | 1 | 1 | 1 | 30 | 46 |
| 68 | 55 | 0 | 0 | 1 | 1 | 1 | 0 | 1 | 1 | 0 | 20 | 28 |
| 72 | 51 | 1 | 1 | 0 | 1 | 1 | 0 | 1 | 1 | 1 | 37 | 3  |
| 74 | 55 | 1 | 0 | 1 | 0 | 0 | 1 | 1 | 1 | 1 | 20 | 31 |
| 78 | 36 | 0 | 1 | 1 | 1 | 1 | 1 | 1 | 1 | 0 | 20 | 4  |
| 82 | 59 | 1 | 0 | 1 | 0 | 0 | 1 | 1 | 1 | 1 | 10 | 28 |
| 84 | 56 | 1 | 1 | 1 | 1 | 0 | 0 | 1 | 1 | 0 | 41 | 29 |
| 85 | 40 | 0 | 0 | 0 | 1 | 1 | 0 | 0 | 1 | 0 | 32 | 18 |
| 91 | 60 | 1 | 1 | 1 | 1 | 1 | 1 | 0 | 1 | 1 | 41 | 29 |

---

---

92 40 0

0 1

1 1 0 1 1

0 60

9

---
